# Supplementary material for: Remnant Woven Bone and Calcified Cartilage in Mouse Bone: Differences between Ages/Sex and Effects on Bone Strength
Source: PLoS One. 2016 Nov 9;11(11):e0166476. doi: 10.1371/journal.pone.0166476 (PMC5102366; doi:10.1371/journal.pone.0166476)
Supplement: S1 Table — Group averages for mechanical testing data. (XLSX) [file pone.0166476.s001.xlsx]

## Sheet: Sheet1
	6 wk, F	6 wk, M	13 wk, F	13 wk, M
Cortical Area (mm2)a,b	0.629 ± 0.064	0.705 ± 0.033	0.869 ± 0.027	1.086 ± 0.033
Tissue Mineral Density (mgHA/cm3)a	1061.305 ± 9.734	1058.238 ± 13.182	1204.931 ± 27.059	1178.442 ± 15.308
Stiffness (N*mm)a,b	67.008 ± 7.679	73.552 ± 12.863	145.133 ± 8.303	164.428 ± 11.662
Maximal Force (N)a,b	12.411 ± 1.576	13.785 ± 1.374	24.733 ± 3.739	29.334 ± 2.090
Displacement at Maximal Force (mm)a,b	0.348 ± 0.048	0.368 ± 0.034	0.245 ± 0.045	0.306 ± 0.026
Post-maximum to Fracture Displacement (mm)a	0.343 ± 0.137	0.329 ± 0.101	0.044 ± 0.034	0.091 ± 0.089
Fracture Displacement (mm)a	0.691 ± 0.106	0.698 ± 0.124	0.289 ± 0.014	0.397 ± 0.091
Energy to Fracture (N*mm)b	6.026 ± 1.075	7.148 ± 0.577	4.504 ± 0.533	7.882 ± 2.525
Energy to Maximal Force (N*mm)a	2.904 ± 0.614	3.395 ± 0.200	3.583 ± 1.115	5.543 ± 0.874
Post-maximum to Fracture Energy (N*mm)a	3.122 ± 1.044	3.752 ± 0.441	0.921 ± 0.602	2.339 ± 2.318
Maximal Bending Stress (N/mm2)a	105.439 ± 9.987	104.333 ± 11.324	173.876 ± 23.859	150.177 ± 7.474
Elastic Modulus (N/mm2)a,b	2047.084 ± 390.456	1869.895 ± 311.182	3743.494 ± 480.723	2786.617 ± 222.264
a Age significant factor, two-way ANOVA, p<0.05
b Sex significant factor, two-way ANOVA, p<0.05
